# Supplementary material for: Adherence to the Planetary Health Diet Index and Obesity Indicators in the Brazilian Longitudinal Study of Adult Health (ELSA-Brasil)
Source: MDPI journal article supplement (doi:10.3390/nu13113691), 2021-10-20
Supplement: s1 [file s1]

**Table S1.** Foods and ingredients included in the PHDI components.

| Components                   | Food items                                                                                                                                        |
|------------------------------|---------------------------------------------------------------------------------------------------------------------------------------------------|
| Nuts and peanuts             | Nuts, pistachios, almonds, peanuts, and coconut pulp and milk                                                                                     |
| Legumes‡                     | Beans, pulses, lentils, chickpeas, peas, and soybeans.                                                                                            |
| Fruits                       | All fruits, including fruits used in juices, nectars and punches.                                                                                 |
| Vegetables                   | All vegetables                                                                                                                                    |
| Whole cereals                | Brown rice, whole breads, and oat flakes                                                                                                          |
| Eggs                         | Chicken eggs and other poultry                                                                                                                    |
| Fish and seafood             | Fish and seafood, such as mussels and shrimp                                                                                                      |
| Tubers and potatoes          | All types of potatoes and cassava as well as their derivatives flours                                                                             |
| Dairy§                       | Cow, goat, buffalo milk, yogurt, and cheese                                                                                                       |
| Vegetable oils <sup>a</sup>  | Vegetable oils used in recipes, such as soybean oil, sunflower oil and olive oil.                                                                 |
| DGV/total ratio <sup>b</sup> | Broccoli, arugula, cabbage, chicory, and watercress                                                                                               |
| ReV/total ratio <sup>c</sup> | Tomatoes, beetroots, carrots, and pumpkins                                                                                                        |
| Red meat£                    | Beef, lamb, pork, and processed meats                                                                                                             |
| Chicken and substitutes      | Chicken, poultry and excess substitutes (ie eggs, fish and seafood)                                                                               |
| Animal fats†                 | Butter and creams (e.g., sour cream and cheese cream)                                                                                             |
| Added sugars                 | All sweetener intake, including the sugars used as ingredients in processed or culinary products and the table sugar added to foods and beverages |

**Table 2.** Multiple linear regression of the association between the Planetary Health Diet Index and obesity indicators without under and overreporting of energy intake. ELSA-Brasil, 2008-2010.

|             |                       | Planetary Health Diet Index |                    |                     |                     |                     |                                                    |                     |
|-------------|-----------------------|-----------------------------|--------------------|---------------------|---------------------|---------------------|----------------------------------------------------|---------------------|
|             |                       | Quintiles <sup>a</sup>      |                    |                     |                     |                     | Continuous (10 points increase in the total score) |                     |
|             |                       | 1st                         | 2th                | 3th                 | 4th                 | 5th                 | p for trend                                        |                     |
|             |                       |                             | β (95% CI)         | β (95% CI)          | β (95% CI)          | β (95% CI)          | β (95% CI)                                         |                     |
| BMI (kg/m²) | Model age-adjusted£   | ref                         | -0.08 (-0.33:0.17) | -0.22 (-0.46:0.03)  | 0.05 (-0.20:0.30)   | -0.38 (-0.63:-0.13) | 0.026                                              | -0.11 (-0.18:-0.04) |
|             | Model fully adjusted§ | ref                         | -0.13 (-0.36:0.10) | -0.25 (-0.48:-0.02) | -0.07 (-0.30:0.17)  | -0.50 (-0.74:-0.27) | <0.001                                             | -0.14 (-0.21:-0.08) |
|             | WC (cm)               |                             |                    |                     |                     |                     |                                                    |                     |
|             | Model age-adjusted£   | ref                         | -0.36 (-1.01:0.30) | -1.08 (-1.73:-0.42) | -0.50 (-1.15:0.16)  | -1.54 (-2.19:-0.88) | <0.001                                             | -0.48 (-0.66:-0.30) |
|             | Model fully adjusted§ | ref                         | -0.44 (-1.02:0.14) | -1.04 (-1.62:-.046) | -0.81 (-1.39:-0.23) | -1.66 (-2.25:-1.08) | <0.001                                             | -0.48 (-0.66:-0.30) |

£Model adjusted for age. §Model adjusted for age, sex, self-reported race, income, smoking, alcohol intake, physical activity, diabetes, hypertension, dyslipidemia, energy intake and dietary changes in the last six months.

**Table S3.** Multiple multinomial logistic regression between Planetary Health Diet Index and overweight and obesity without under and overreporting of energy intake. ELSA-Brasil, 2008-2010.

|                                                           | Overweight* |           | Obesity* |           |
|-----------------------------------------------------------|-------------|-----------|----------|-----------|
|                                                           | OR          | 95% CI    | OR       | 95% CI    |
| <b>Model age-adjusted£</b>                                |             |           |          |           |
| <i>PHDI quintiles</i>                                     |             |           |          |           |
| 1st quintile                                              |             | ref       |          | ref       |
| 2th quintile                                              | 0.86        | 0.76:0.96 | 0.99     | 0.86:1.14 |
| 3th quintile                                              | 0.83        | 0.74:0.94 | 0.97     | 0.84:1.11 |
| 4th quintile                                              | 0.93        | 0.83:1.05 | 1.02     | 0.89:1.17 |
| 5th quintile                                              | 0.76        | 0.68:0.86 | 0.83     | 0.72:0.96 |
| <i>p for trend</i>                                        |             | <0.001    |          | <0.05     |
| <i>Continuous (10 points increase in the total score)</i> | 0.93        | 0.90:0.96 | 0.92     | 0.88:0.96 |
| <b>Model fully adjusted§</b>                              |             |           |          |           |
| <i>PHDI quintiles</i>                                     |             |           |          |           |
| 1st quintile                                              |             | ref       |          | ref       |
| 2th quintile                                              | 0.85        | 0.76:0.96 | 0.96     | 0.83:1.11 |
| 3th quintile                                              | 0.84        | 0.74:0.95 | 0.95     | 0.82:1.10 |
| 4th quintile                                              | 0.92        | 0.80:1.03 | 0.96     | 0.83:1.12 |
| 5th quintile                                              | 0.75        | 0.66:0.85 | 0.76     | 0.65:0.88 |
| <i>p for trend</i>                                        |             | <0.001    |          | <0.001    |
| <i>Continuous (10 points increase in the total score)</i> | 0.93        | 0.90:0.96 | 0.92     | 0.88:0.96 |

OR: odds ratio. 95% CI: 95% confidence interval. \*ref = WC<80cm for women and <90cm for men. £Model adjusted for age. §Model adjusted for age, sex, self-reported race, income, smoking, alcohol intake, physical activity, diabetes, hypertension, dyslipidemia, energy intake and dietary changes in the last six months.

**Table S4.** Multiple multinomial logistic regression between Planetary Health Diet Index and abdominal obesity without under and overreporting of energy intake. ELSA-Brasil, 2008-2010.

|                                                           | Increased abdominal obesity* |           | Substantially increased abdominal obesity* |           |
|-----------------------------------------------------------|------------------------------|-----------|--------------------------------------------|-----------|
|                                                           | OR                           | 95% CI    | OR                                         | 95% CI    |
| <b>Model age-adjusted£</b>                                |                              |           |                                            |           |
| <i>PHDI quintiles</i>                                     |                              |           |                                            |           |
| 1st quintile                                              |                              | ref       |                                            | ref       |
| 2th quintile                                              | 0.87                         | 0.76:0.99 | 0.99                                       | 0.88:1.12 |
| 3th quintile                                              | 0.87                         | 0.76:0.99 | 0.91                                       | 0.80:1.03 |
| 4th quintile                                              | 0.89                         | 0.78:1.02 | 0.94                                       | 0.83:1.06 |
| 5th quintile                                              | 0.90                         | 0.79:1.03 | 0.82                                       | 0.72:0.93 |
| <i>p for trend</i>                                        |                              | 0.138     |                                            | <0.001    |
| <i>Continuous (10 points increase in the total score)</i> | 0.97                         | 0.93:1.00 | 0.94                                       | 0.90:0.97 |
| <b>Model fully adjusted§</b>                              |                              |           |                                            |           |
| <i>PHDI quintiles</i>                                     |                              |           |                                            |           |
| 1st quintile                                              |                              | ref       |                                            | ref       |
| 2th quintile                                              | 0.86                         | 0.75:0.99 | 0.97                                       | 0.85:1.11 |
| 3th quintile                                              | 0.85                         | 0.75:0.98 | 0.87                                       | 0.76:0.99 |
| 4th quintile                                              | 0.88                         | 0.77:1.00 | 0.88                                       | 0.77:1.01 |
| 5th quintile                                              | 0.87                         | 0.76:0.99 | 0.73                                       | 0.64:0.84 |
| <i>p for trend</i>                                        |                              | 0.098     |                                            | <0.001    |
| <i>Continuous (10 points increase in the total score)</i> | 0.95                         | 0.92:0.99 | 0.91                                       | 0.88:0.94 |

OR: odds ratio. 95% CI: 95% confidence interval. \*ref = WC<80cm for women and <90cm for men. £Model adjusted for age. §Model adjusted for age, sex, self-reported race, income, smoking, alcohol intake, physical activity, diabetes, hypertension, dyslipidemia, energy intake and dietary changes in the last six months.
